# Supplementary material for: A cyanide-bridged Fe–Co pearl-chain-like single-chain magnet containing 4-coordinate cobalt(ii) ions
Source: Royal Society of Chemistry journal article supplement (doi:10.1039/d1dt02844h), 2021-01-01
Supplement: d1dt02844h1.pdf [file d1dt02844h1.pdf]

## Supplementary Information

### A cyanide-bridged Fe-Co pearl-like single chain magnet containing 4-coordinate cobalt(II) ions

Yue Cheng, Qi Liu, Zi-Yi Chen\*, and Yuan-Zhu Zhang\*

Department of Chemistry, Southern University of Science and Technology, Shenzhen,  
518055, China.

#### Contents

**Table S1-S2** Selected Bond lengths [Å] and angles [deg] for **1** and **2**.

**Table S3.** Continuous Shape Measures calculated by *SHAPE* Software for **1** and **2**.

**Fig. S1** IR spectrum of compound **1**.

**Fig. S2** Experimental and simulated PXRD patterns of **1**.

**Fig. S3** IR spectrum of compound **2**.

**Fig. S4-S5** Thermo-gravimetric curve of **1** and **2**.

**Fig. S6-S7** Crystal structure of **1** and **2** drawn with ellipsoids at the 50% probability level.

**Fig. S8-S9** The packing diagram of **1** and **2**.

**Fig. S10-S11** Zero-field cooled and field-cooled magnetization data of **1** and **2** at 2–20 K.

**Fig. S12** Temperature dependence of the in-phase ( $\chi'$ ) and out-of-phase ( $\chi''$ ) ac magnetic susceptibilities for **1** under 1 kOe dc field.

**Fig. S13** Alternating current molar magnetic susceptibilities for **2** under zero dc field.

**Table S1** Selected Bond lengths [Å] and angles [deg] for **1**.

|                                                                                                                                                                        |                                                                                                                                  |                                                                                                                                         |                                                                        |
|------------------------------------------------------------------------------------------------------------------------------------------------------------------------|----------------------------------------------------------------------------------------------------------------------------------|-----------------------------------------------------------------------------------------------------------------------------------------|------------------------------------------------------------------------|
| <b>Fe1</b><br>Fe1–C1<br>Fe1–C2<br>Fe1–C3<br>Fe1–N4<br>Fe1–N6<br>Fe1–N8                                                                                                 | 1.908(7)<br>1.923(6)<br>1.926(7)<br>1.963(5)<br>1.949(5)<br>1.962(5)                                                             | <b>Co1</b><br>Co1–N1<br>Co1–N3 <sup>2</sup><br>Co1–Cl1<br>Co1–Cl2                                                                       | 2.026(6)<br>2.042(6)<br>2.233(3)<br>2.250(3)                           |
| <b>Co2</b><br>Co2–N2<br>Co2–N2 <sup>1</sup><br>Co2–O1<br>Co2–O2<br>Co2–O1 <sup>1</sup><br>Co2–O2 <sup>1</sup>                                                          | 2.103(6)<br>2.103(6)<br>2.079(6)<br>2.075(7)<br>2.079(6)<br>2.075(7)                                                             |                                                                                                                                         |                                                                        |
| <b>Fe1</b><br>C1–Fe1–C2<br>C1–Fe1–C3<br>C1–Fe1–N6<br>C1–Fe1–N8<br>C2–Fe1–C3<br>C2–Fe1–N4<br>C2–Fe1–N8<br>C3–Fe1–N4<br>C3–Fe1–N6<br>N4–Fe1–N6<br>N4–Fe1–N8<br>N6–Fe1–N8 | 90.1(3)<br>84.1(3)<br>91.0(3)<br>95.9(2)<br>88.8(3)<br>89.3(2)<br>91.1(2)<br>91.6(2)<br>92.2(3)<br>89.6(2)<br>88.4(2)<br>87.9(2) | <b>Co1</b><br>N1–Co1–N3 <sup>2</sup><br>N1–Co1–Cl1<br>N1–Co1–Cl2<br>N3 <sup>2</sup> –Co1–Cl1<br>N3 <sup>2</sup> –Co1–Cl2<br>Cl1–Co1–Cl2 | 104.5(3)<br>107.0(2)<br>112.5(3)<br>109.7(2)<br>107.4(3)<br>115.18(14) |
| <b>Co2</b><br>N2–Co2–O1<br>N2–Co2–O1 <sup>1</sup><br>N2–Co2–O2<br>N2–Co2–O2 <sup>1</sup><br>O1–Co2–O2<br>O1–Co2–O2 <sup>1</sup>                                        | 87.4(3)<br>91.7(2)<br>91.6(3)<br>88.4(3)<br>87.4(3)<br>92.6(3)                                                                   |                                                                                                                                         |                                                                        |

**Table S2** Selected Bond lengths [Å] and angles [deg] for **2**.

|                                                                                                                                                                            |                                                                                                                                  |                                                                                                                                         |                                                                      |
|----------------------------------------------------------------------------------------------------------------------------------------------------------------------------|----------------------------------------------------------------------------------------------------------------------------------|-----------------------------------------------------------------------------------------------------------------------------------------|----------------------------------------------------------------------|
| <b>Fe1</b><br>Fe1–C1<br>Fe1–C2<br>Fe1–C3<br>Fe1–N6<br>Fe1–N8<br>Fe1–N10                                                                                                    | 1.928(7)<br>1.931(8)<br>1.923(8)<br>2.004(7)<br>2.002(6)<br>1.979(7)                                                             | <b>Co1</b><br>Co1–N1<br>Co1–N3 <sup>1</sup><br>Co1–Cl1<br>Co1–Cl2                                                                       | 1.987(6)<br>1.989(7)<br>2.294(5)<br>2.195(4)                         |
| <b>Co2</b><br>Co2–N2<br>Co2–N2 <sup>2</sup><br>Co2–O1<br>Co2–O2<br>Co2–O1 <sup>2</sup><br>Co2–O2 <sup>2</sup>                                                              | 2.107(6)<br>2.107(6)<br>2.100(7)<br>2.061(7)<br>2.100(7)<br>2.061(7)                                                             |                                                                                                                                         |                                                                      |
| <b>Fe1</b><br>C1–Fe1–C2<br>C1–Fe1–C3<br>C1–Fe1–N6<br>C1–Fe1–N10<br>C2–Fe1–C3<br>C2–Fe1–N6<br>C2–Fe1–N8<br>C3–Fe1–N8<br>C3–Fe1–N10<br>N6–Fe1–N8<br>N8–Fe1–N10<br>N6–Fe1–N10 | 90.9(3)<br>87.1(3)<br>90.7(3)<br>90.0(3)<br>89.8(3)<br>90.2(3)<br>88.7(3)<br>92.5(3)<br>90.5(3)<br>89.7(3)<br>90.3(3)<br>89.6(3) | <b>Co1</b><br>N1–Co1–N3 <sup>1</sup><br>N1–Co1–Cl1<br>N1–Co1–Cl2<br>N3 <sup>1</sup> –Co1–Cl1<br>N3 <sup>1</sup> –Co1–Cl2<br>Cl1–Co1–Cl2 | 103.2(3)<br>109.0(3)<br>111.9(3)<br>105.1(2)<br>115.0(2)<br>112.0(2) |
| <b>Co2</b><br>N2–Co2–O1<br>N2–Co2–O1 <sup>2</sup><br>N2–Co2–O2<br>N2–Co2–O2 <sup>2</sup><br>O1–Co2–O2<br>O1–Co2–O2 <sup>2</sup>                                            | 88.4(3)<br>91.6(3)<br>88.4(3)<br>91.6(3)<br>89.5(3)<br>90.5(3)                                                                   |                                                                                                                                         |                                                                      |

**Table S3.** Continuous Shape Measures (CShM) calculated by *SHAPE*<sup>1</sup> Software for **1** and **2**.

| Compound | Metal ion | Symmetry | CShM  |
|----------|-----------|----------|-------|
| <b>1</b> | Co1       | $T_d$    | 0.493 |
|          | Co2       | $O_h$    | 0.068 |
|          | Fe1       | $O_h$    | 0.140 |
| <b>2</b> | Co1       | $T_d$    | 0.550 |
|          | Co2       | $O_h$    | 0.050 |
|          | Fe1       | $O_h$    | 0.047 |

1. *SHAPE*, version 2.0: continuous shape measures calculation; Electronic Structure Group, Universitat de Barcelona: Barcelona, Spain, 2010.

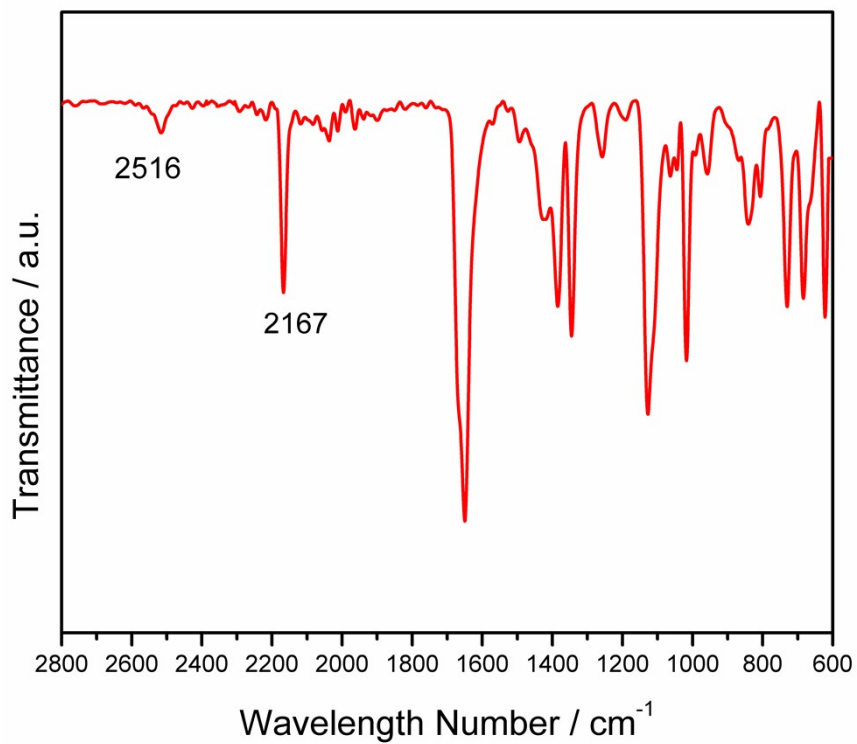

**Fig. S1** IR spectrum of compound **1**.

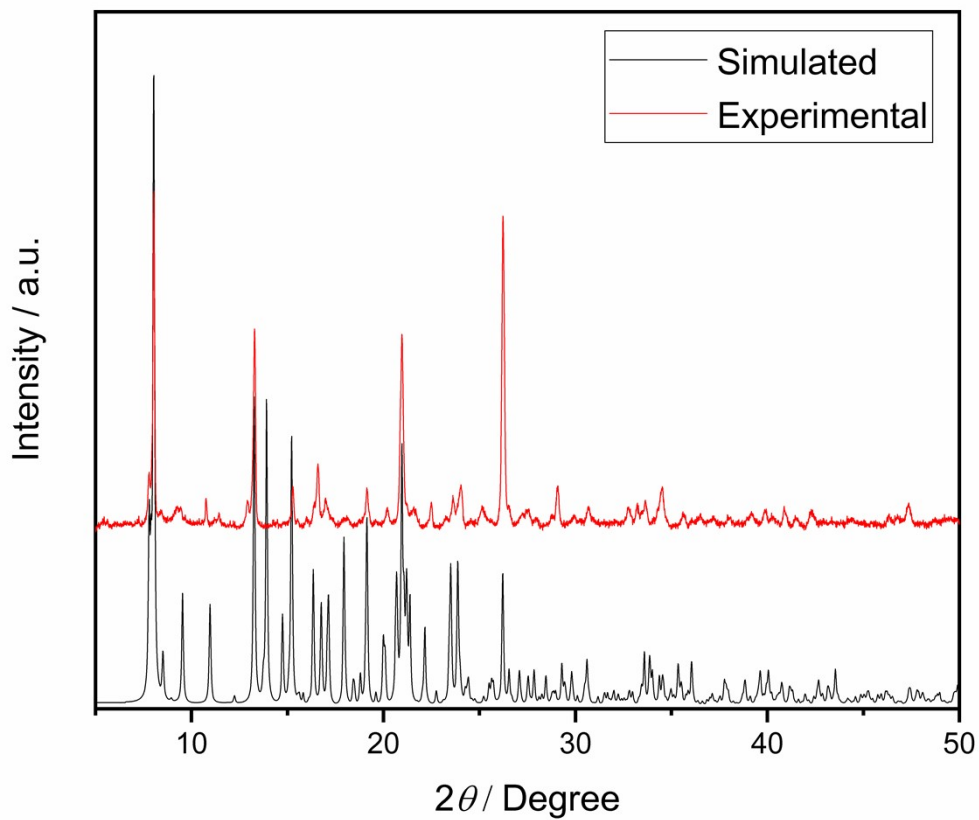

**Fig. S2** Experimental and simulated PXRD patterns of **1**.

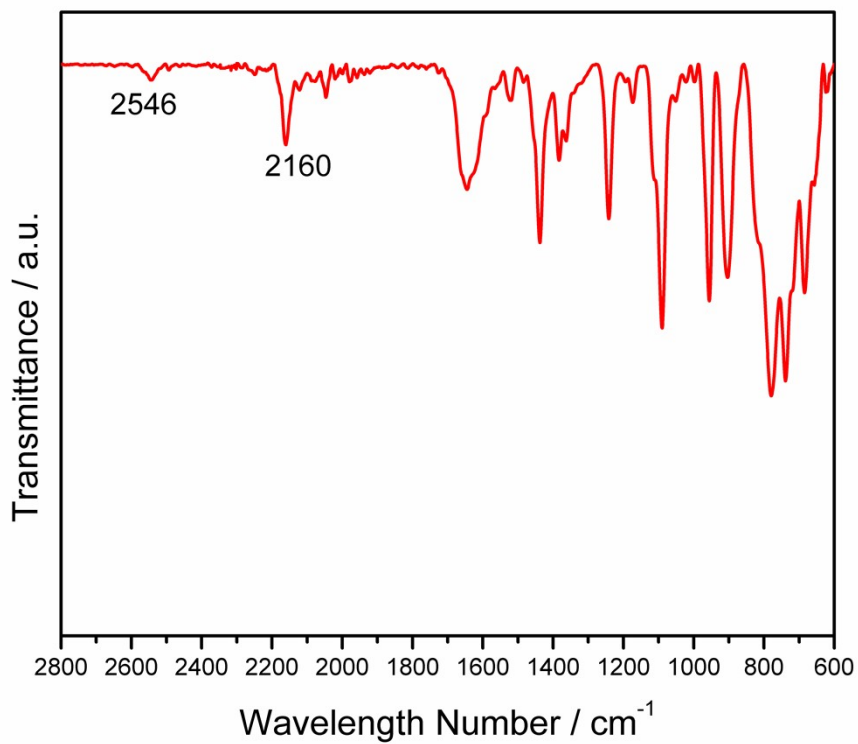

**Fig. S3** IR spectrum of compound **2**.

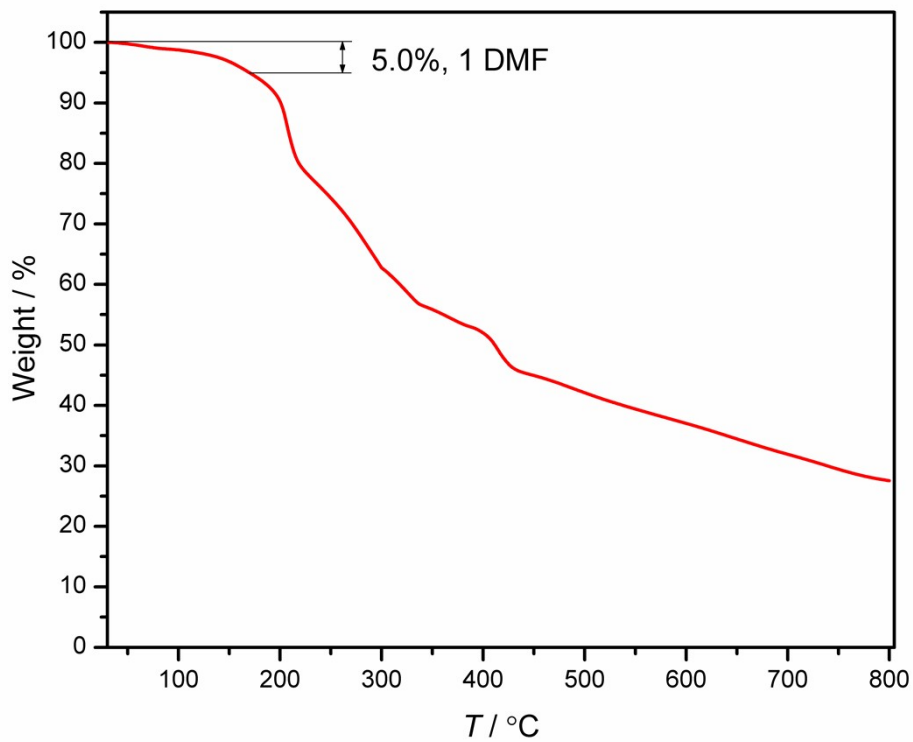

**Fig. S4** Thermo-gravimetric curve of **1**.

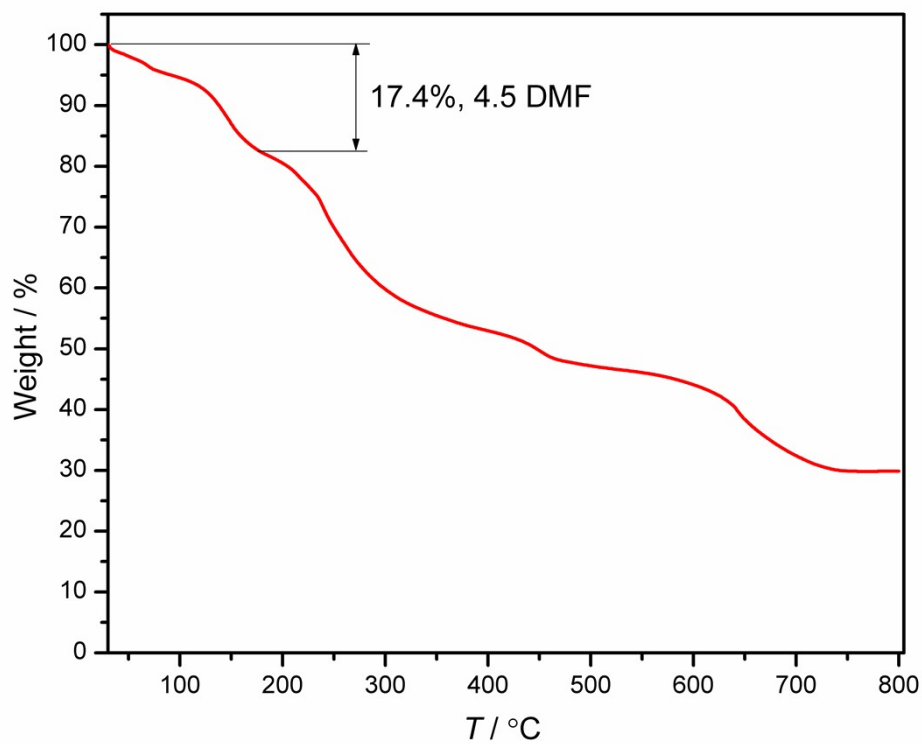

**Fig. S5** Thermo-gravimetric curve of **2**.

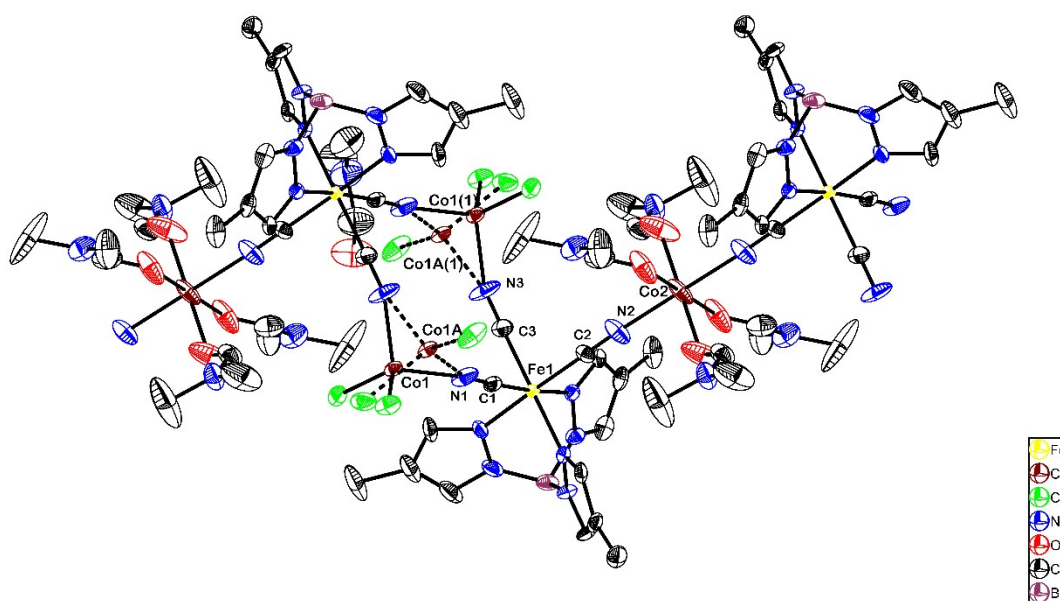

**Fig. S6** Crystal structure of **1** drawn with ellipsoids at the 50% probability level. The hydrogen atoms have been omitted for the sake of clarity.

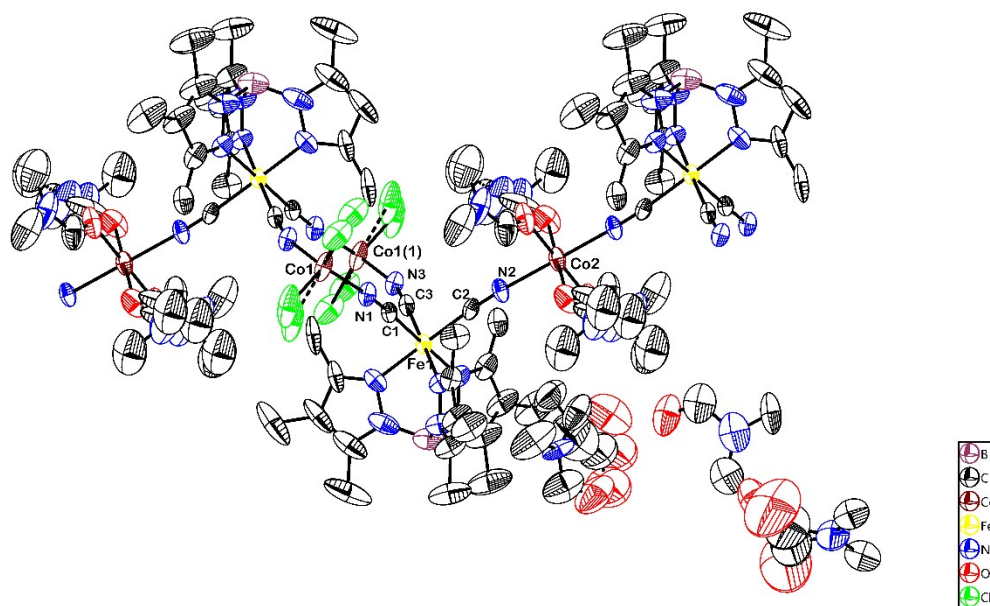

**Fig. S7** Crystal structure of **2** drawn with ellipsoids at the 50% probability level. The hydrogen atoms have been omitted for the sake of clarity.

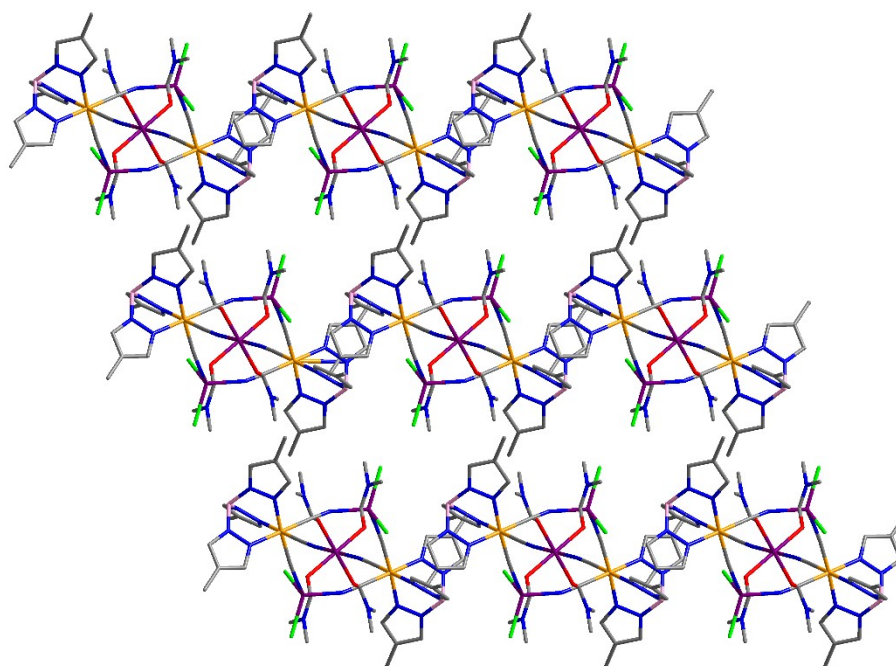

**Fig. S8** The packing diagram of **1** view along the crystallographic b axis.



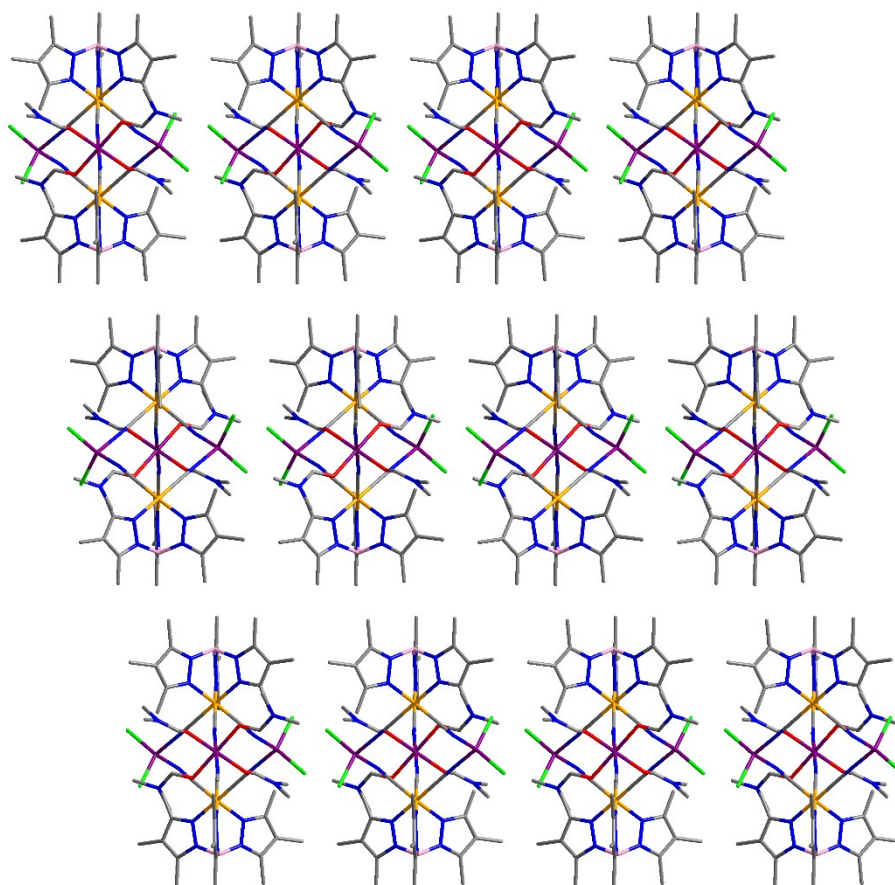

**Fig. S9** The packing diagram of **2** view along the crystallographic b axis.

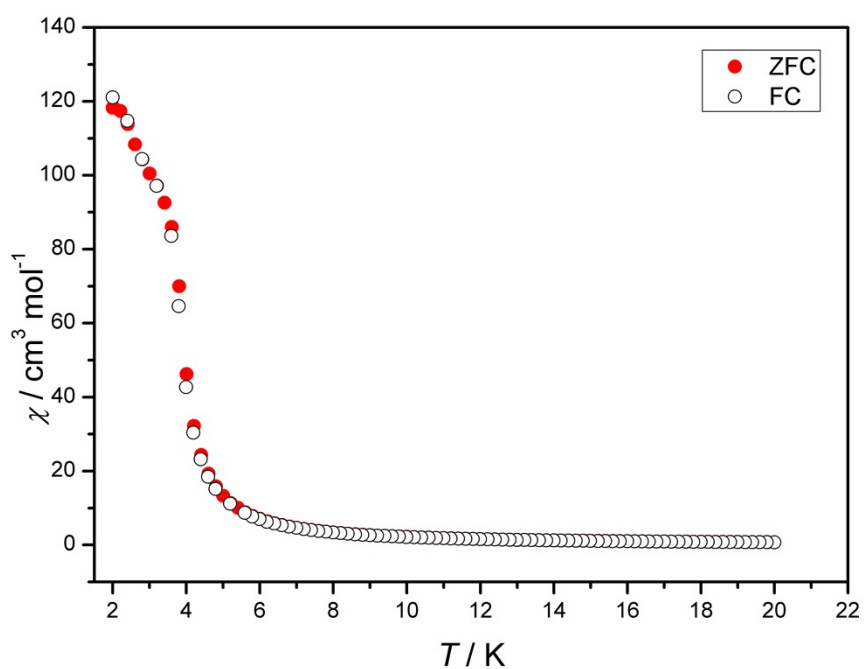

**Fig. S10** Zero-field cooled and field-cooled magnetization data of **1** at 2–20 K.

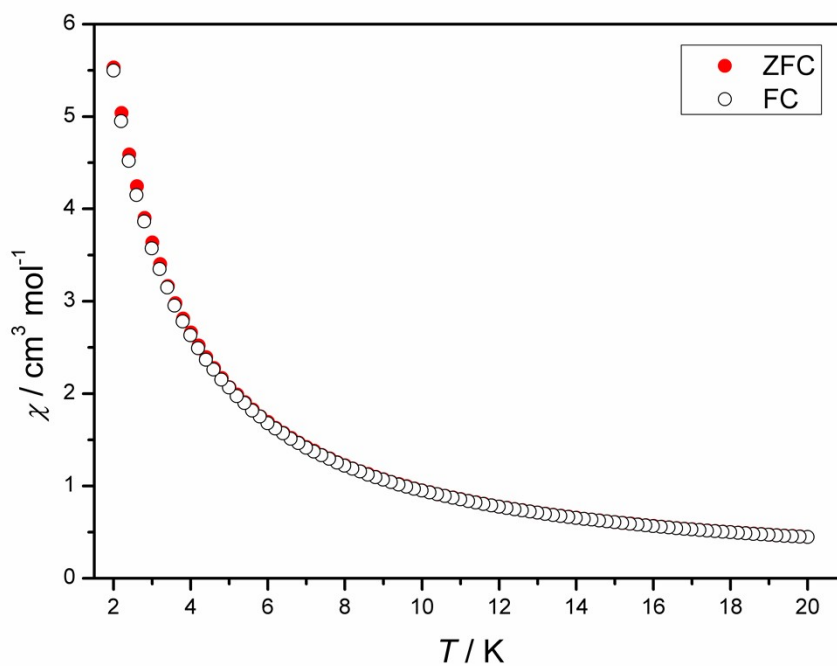

**Fig. S11** Zero-field cooled and field-cooled magnetization data of **2** at 2–20 K.

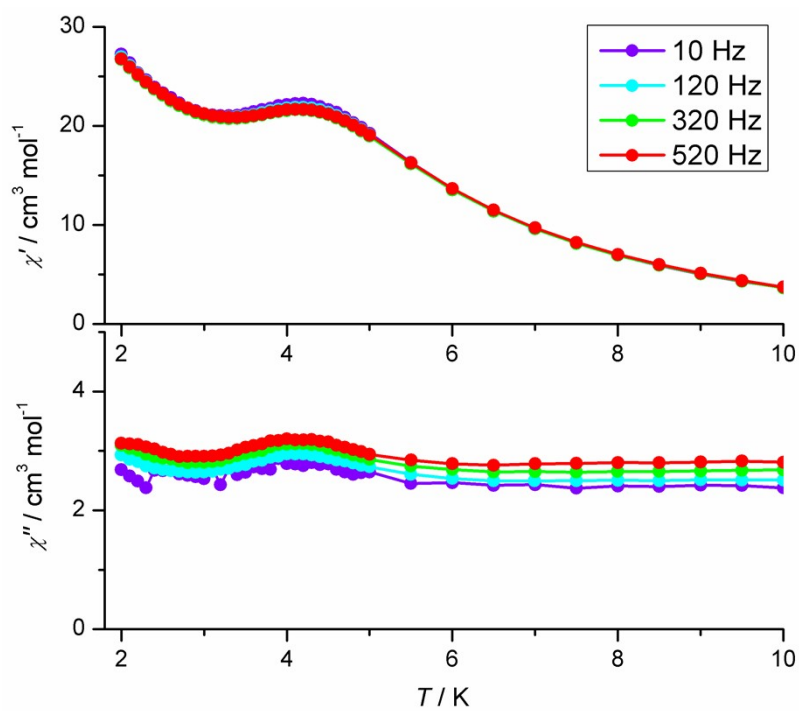

**Fig. S12** Temperature dependence of the in-phase ( $\chi'$ ) and out-of-phase ( $\chi''$ ) ac magnetic susceptibilities for **1** under 1 kOe dc field.

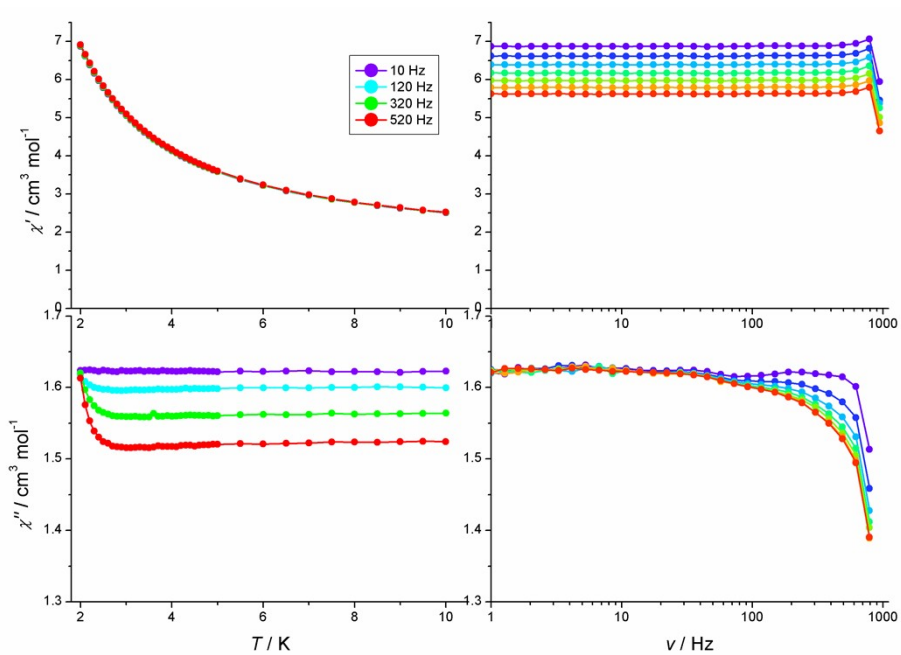

**Fig. S13** Temperature (left) and frequency (right) dependence of the in-phase ( $\chi'$ ) and out-of-phase ( $\chi''$ ) ac magnetic susceptibilities for **2** under zero dc field.
